# Supplementary material
Source: Springer Nature journal article supplement (https://www.springermedizin.de/resource/supplementary/13229_2013_121_MOESM3_ESM.pdf/9676226)
Supplement: MOESM3 [file 9676226]

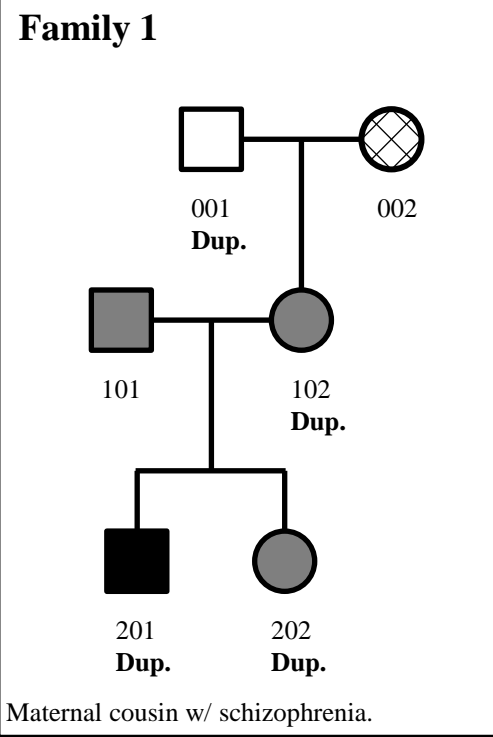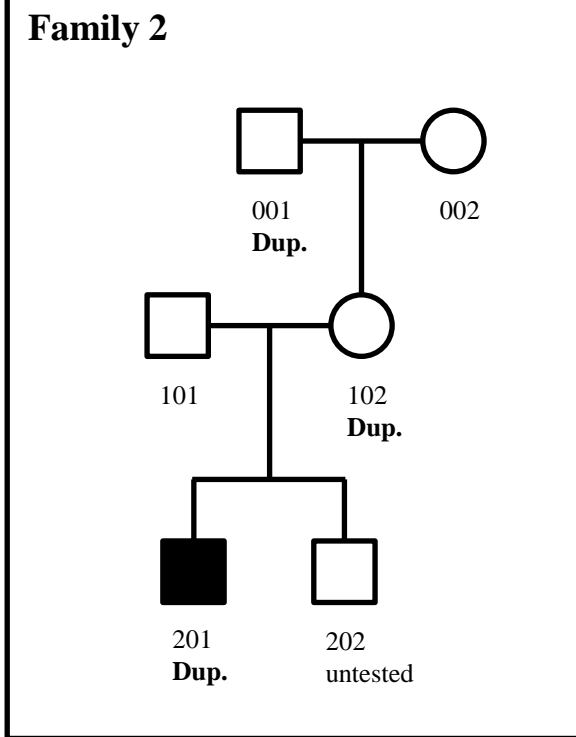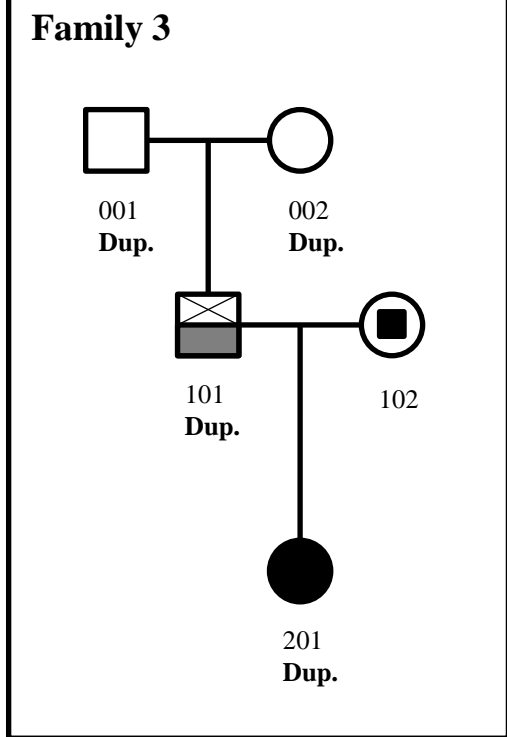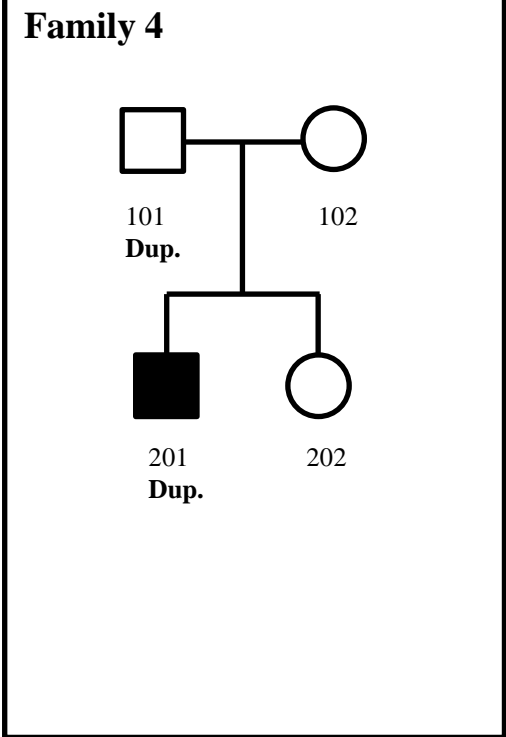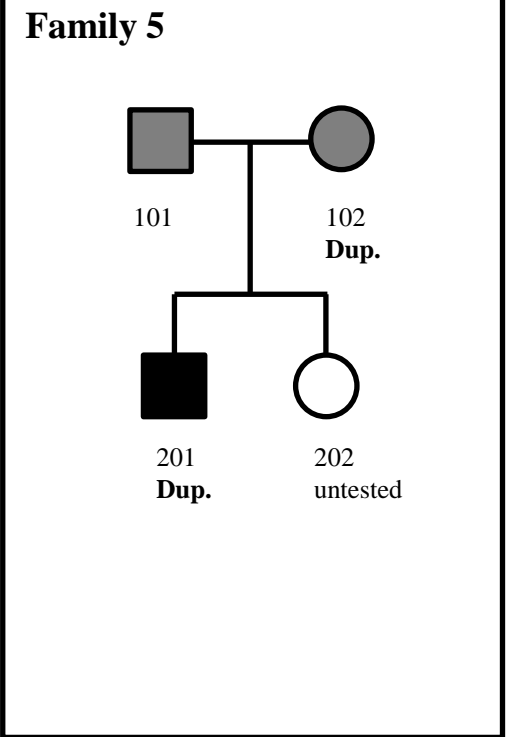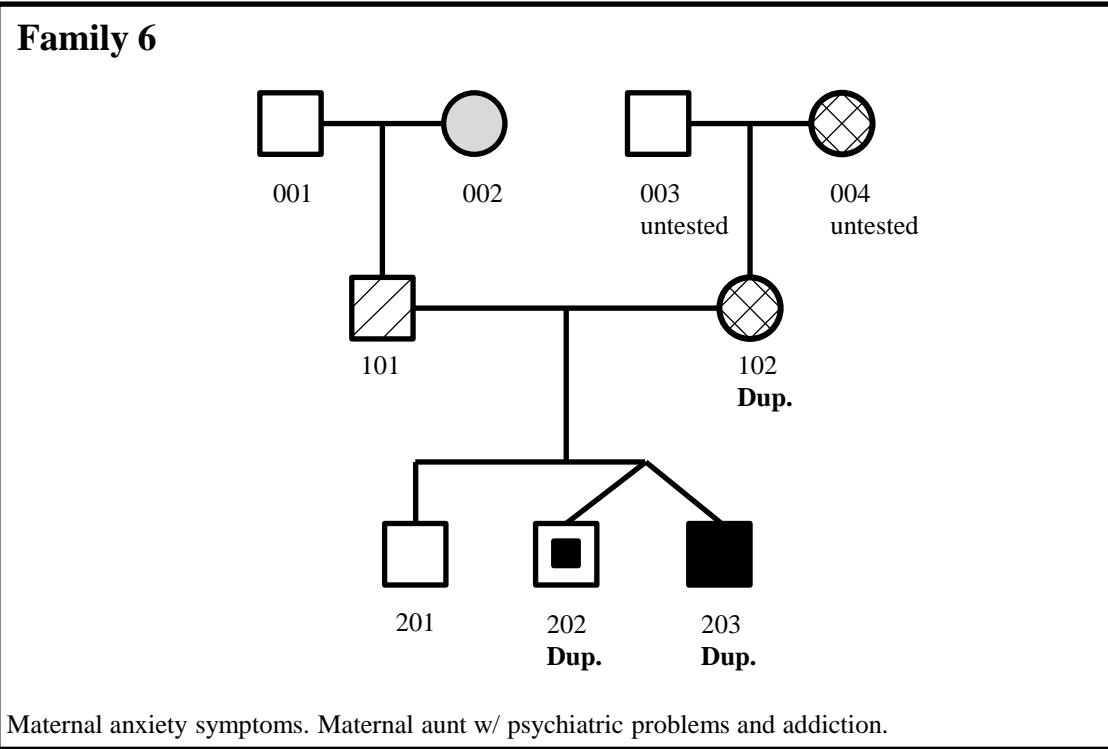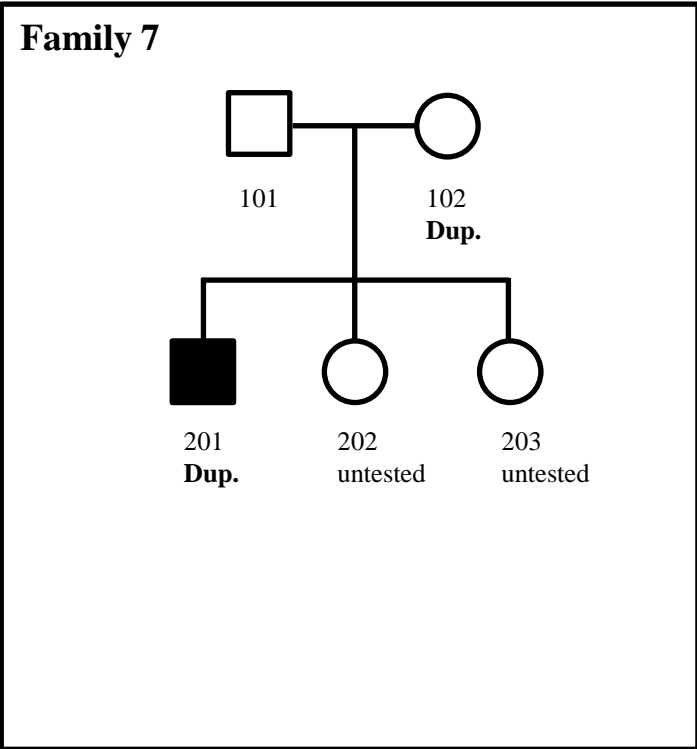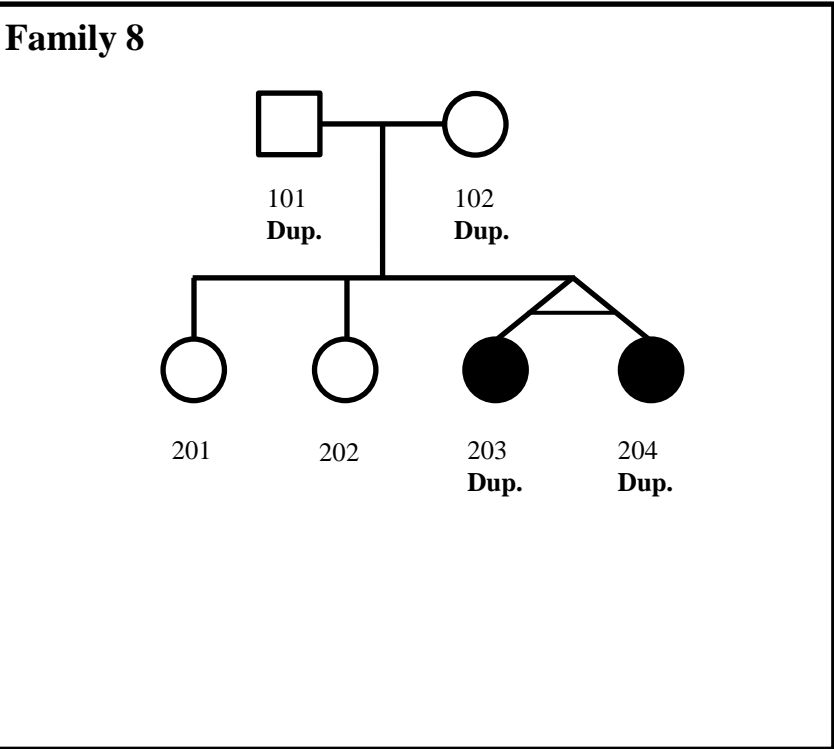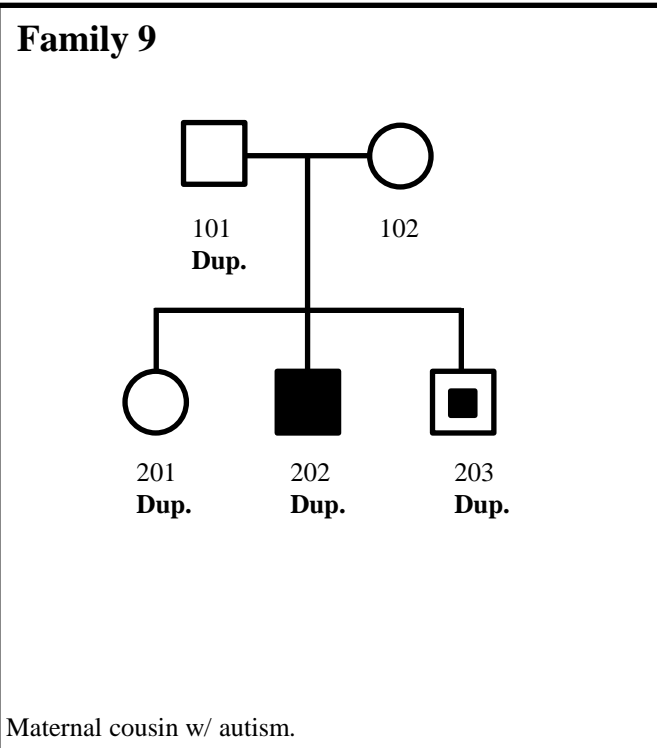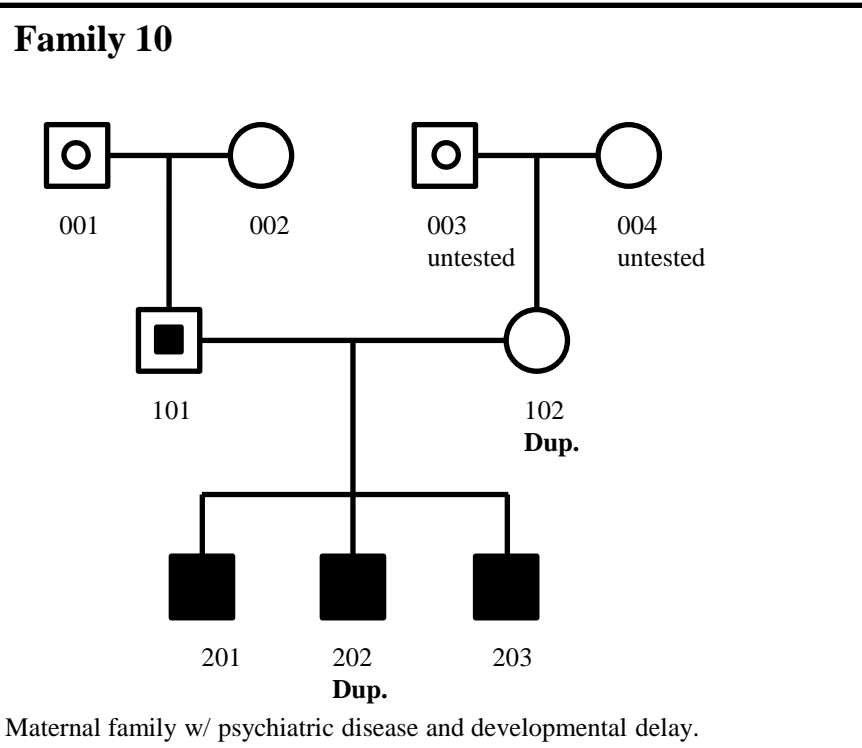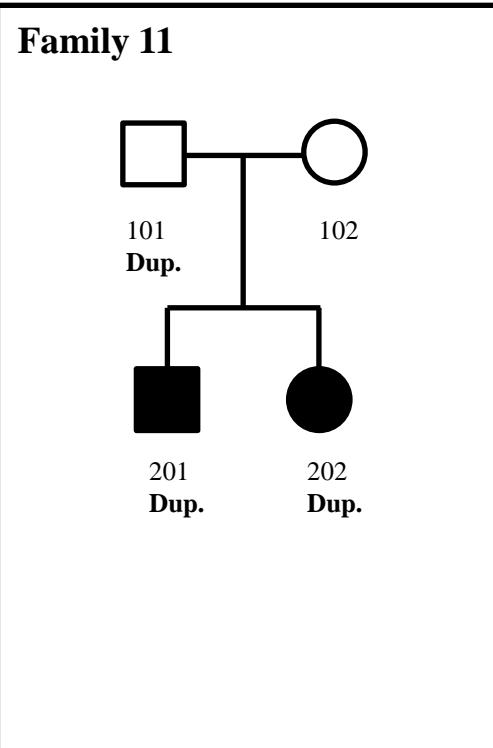

- Autism Spectrum Disorder
- Positive SRS and/or PSPQ
- Depression
- Language/learning problems
- Schizophrenia
- Epilepsy
- Addiction
- Psychiatric disease unspecified
